# Supplementary material for: Ordered mesoporous TiO2/SBA-15 confined CexWy catalysts for selective catalytic reduction of NO using NH3
Source: Royal Society of Chemistry journal article supplement (doi:10.1039/d2nj03801c), 2022-01-01
Supplement: d2nj03801c1.pdf [file d2nj03801c1.pdf]

---

## Supplementary Information

### Ordered mesoporous TiO<sub>2</sub>/SBA-15 confined Ce<sub>x</sub>W<sub>y</sub> catalyst for selective catalytic reduction of NO with NH<sub>3</sub>

Yibo Mu<sup>a,b</sup>, Xiaosheng Huang<sup>b</sup>, Zhicheng Tang<sup>b\*\*</sup>, Qingchun Wang<sup>a\*</sup>

*(a. College of materials and metallurgical engineering, Inner Mongolia  
university of science and technology, Baotou 014010, China*

*b. State Key Laboratory for Oxo Synthesis and Selective Oxidation, and National  
Engineering Research Center for Fine Petrochemical Intermediates, Lanzhou  
Institute of Chemical Physics, Chinese Academy of Sciences, Lanzhou, 730000, China)*

*\*Corresponding author:*

Tel.: +86–15184792170, Fax: +86–0472–5955961, E–mail address:

[qingchun0221@126.com](mailto:qingchun0221@126.com)

*\*\*Corresponding author:*

Tel.: +86–931–4968083, Fax: +86–931–4968019, E–mail address:

[tangzhicheng@licp.cas.cn](mailto:tangzhicheng@licp.cas.cn) (Z. Tang).

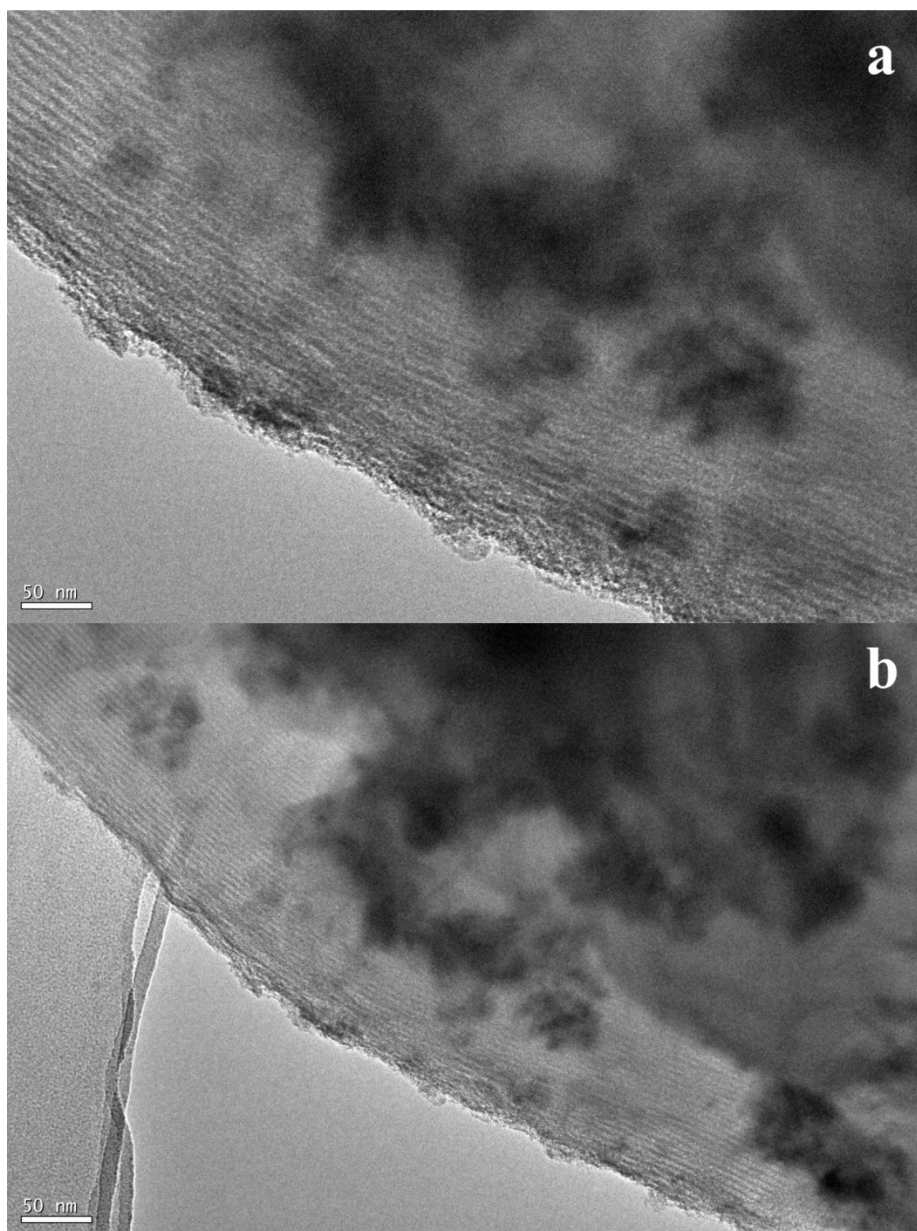

**Figure S1.** TEM image of the catalyst material:  $\text{Ce}_{15}\text{W}_3/\text{TS-3}$ .

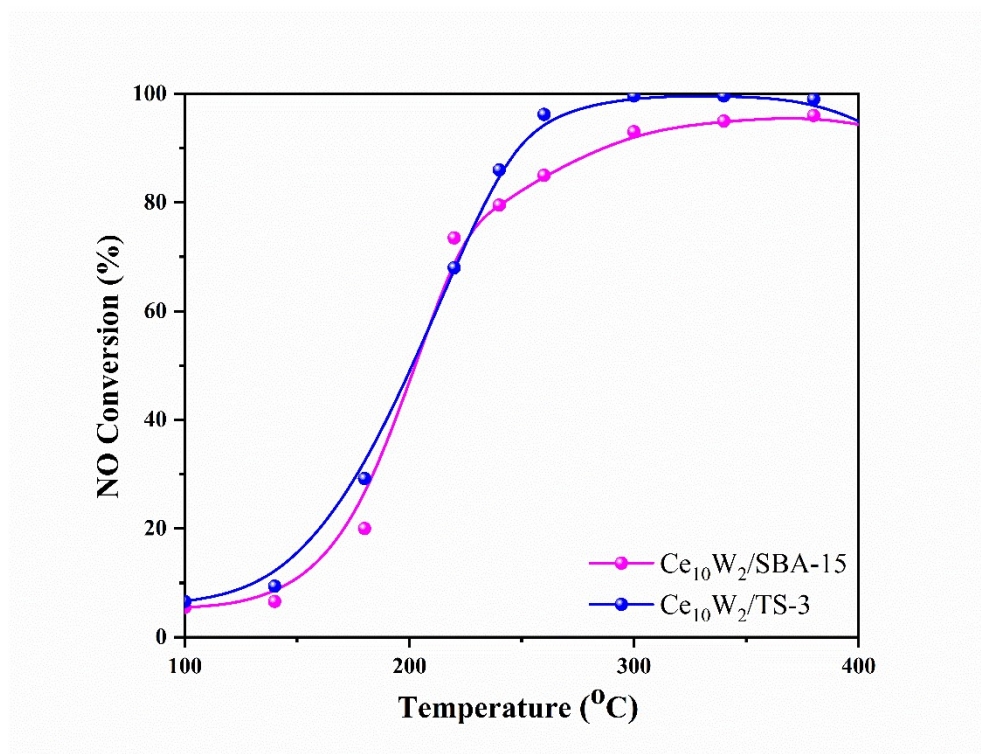

Figure S2. NO conversion of catalyst  $\text{Ce}_{10}\text{W}_2/\text{SBA-15}$  and  $\text{Ce}_{10}\text{W}_2/\text{TS-3}$  at GHSV = 30 000  $\text{h}^{-1}$ .

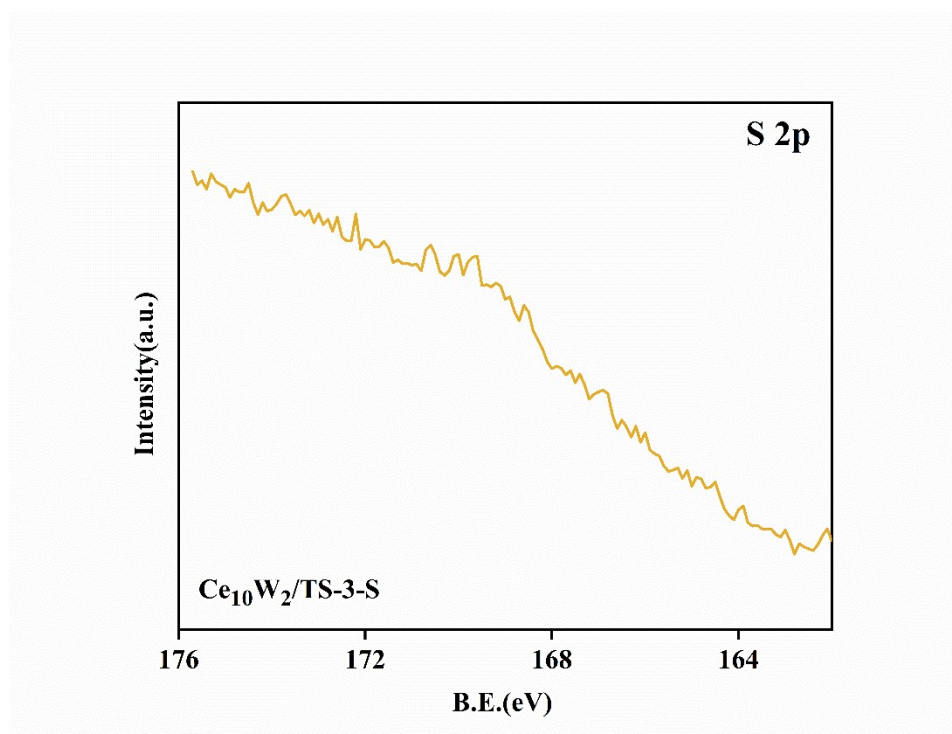

**Figure S3.** XPS spectrum of S 2p of  $\text{Ce}_{10}\text{W}_2/\text{TS-3}$ .

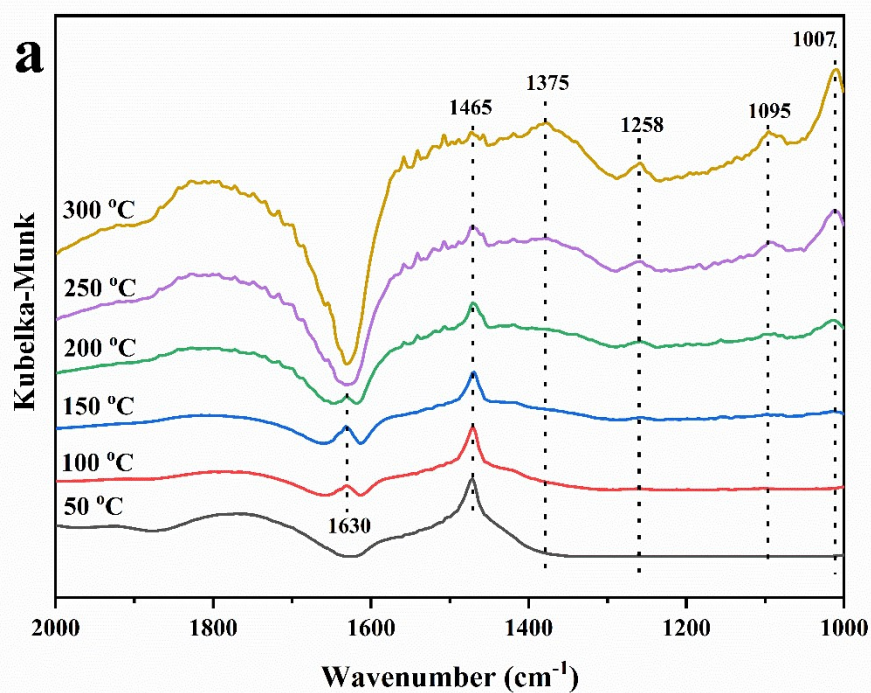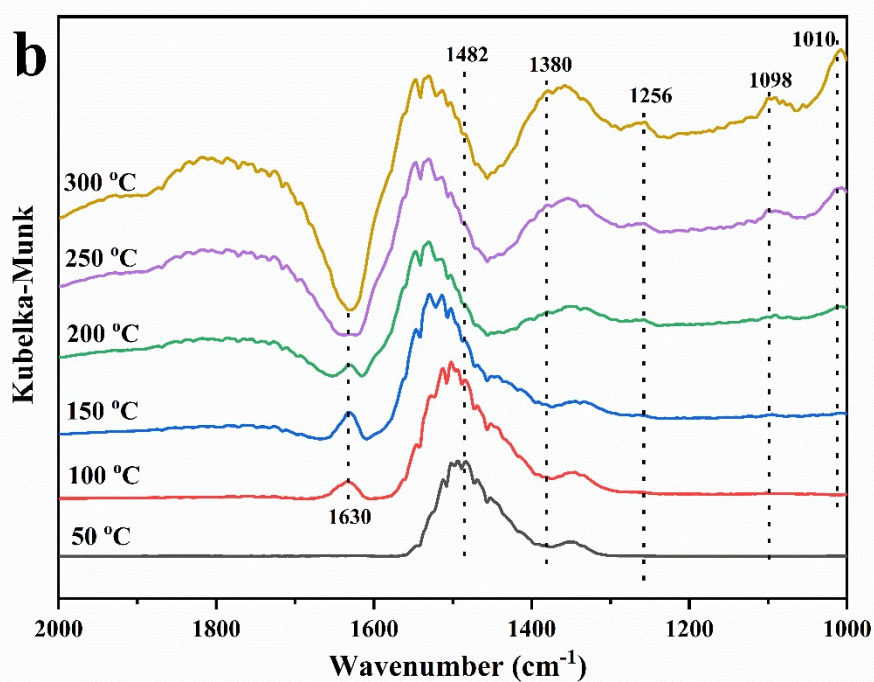

**Figure S4.** In situ DRIFTs spectra and the corresponding mapping results of  $\text{NH}_3$  desorption exposed to a  $\text{N}_2$  flow with temperature (a) and the  $\text{NO} + \text{O}_2$  desorption exposed to a  $\text{N}_2$  flow with temperature (b) over the  $\text{Ce}_{10}\text{W}_2/\text{TS-3}$ .



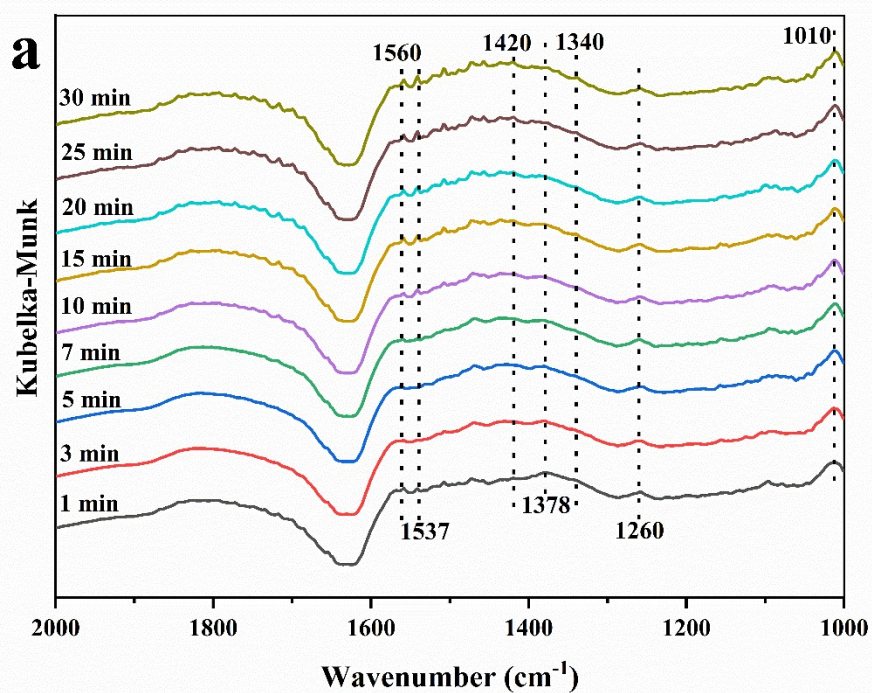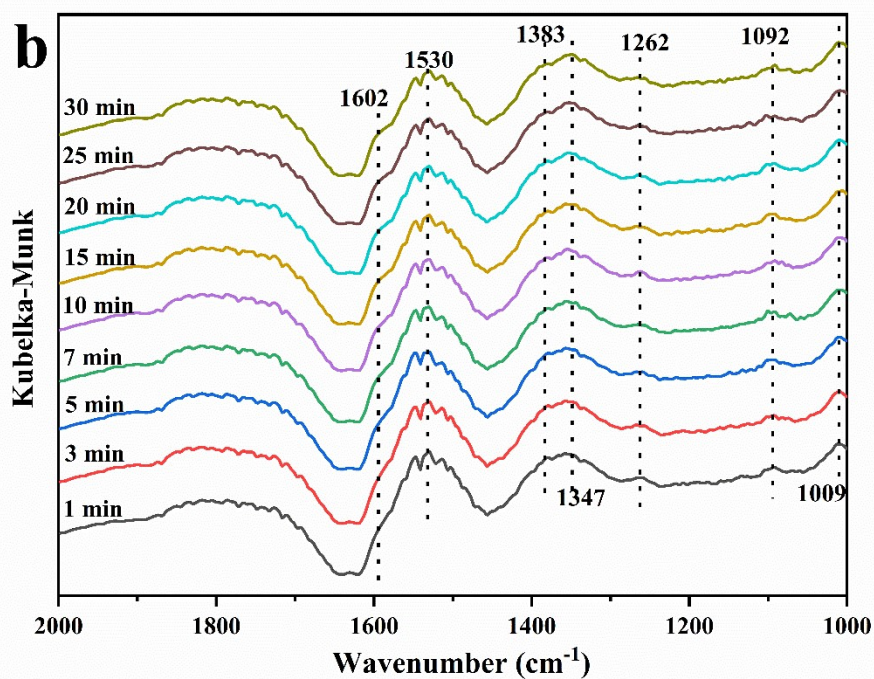

**Figure S5.** In situ DRIFTS spectra corresponding mapping results of  $\text{NH}_3$  adsorption at  $240^\circ\text{C}$  exposed to a flow of 1 vol.%  $\text{NH}_3$  (a) and  $\text{NO} + \text{O}_2$  adsorption at  $240^\circ\text{C}$  exposed to a flow of 1 vol.%  $\text{NO} + 3$  vol.%  $\text{O}_2$  (b) over the  $\text{Ce}_{10}\text{W}_2/\text{TS-3}$ .
